# Supplementary material for: Disruption of Colorectal Cancer Network by Polyphyllins Reveals Pivotal Entities with Implications for Chemoimmunotherapy
Source: MDPI journal article supplement (doi:10.3390/biomedicines10030583), 2022-03-02
Supplement: s1 [file s1]

**Figure S1**

Polyphyllin D

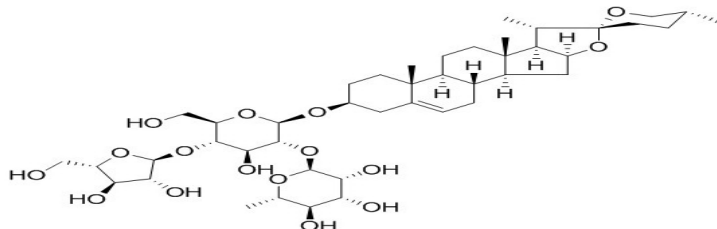

Polyphyllin G

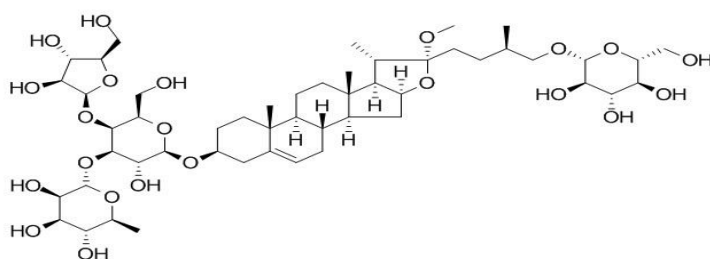

Polyphyllin II

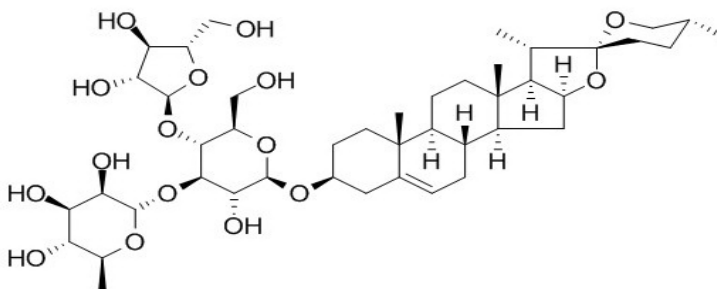

Figure S1. Chemical Structures of Polyphyllin D, Polyphyllin G and Polyphyllin II.
